# Supplementary material for: Whole exome sequencing with a focus on cardiac disease-associated genes in families of sudden unexplained deaths in Yunnan, southwest of China
Source: Springer Nature journal article supplement (doi:10.1186/s12864-022-09097-0), 2023-01-31
Supplement: 12864_2022_9097_MOESM1_ESM.pdf [file 12864_2022_9097_MOESM1_ESM.pdf]

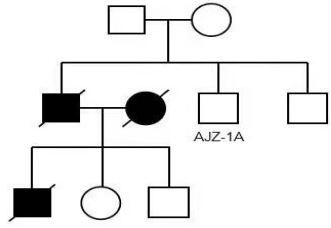

Family 1

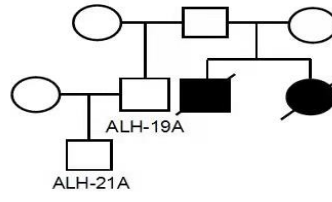

Family 2

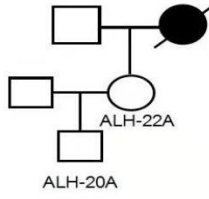

Family 3

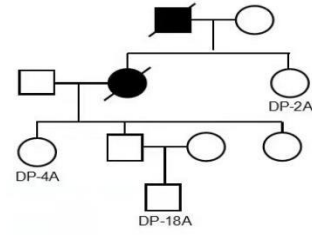

Family 4

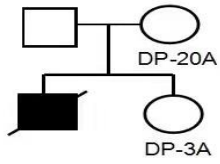

Family 5

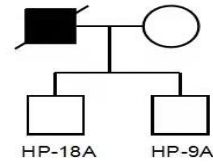

Family 6

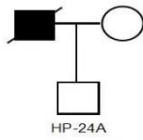

Family 7

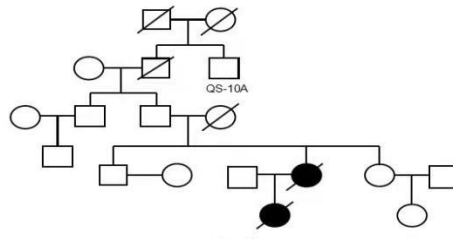

Family 8

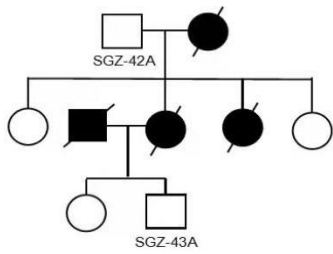

Family 9

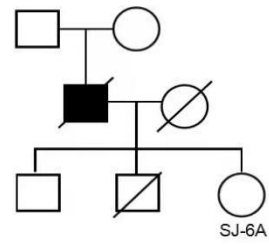

Family 10

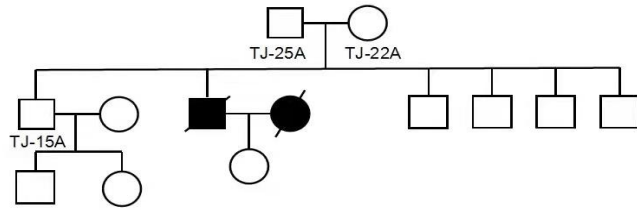

Family11

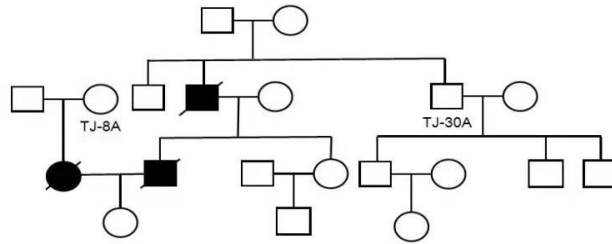

Family12

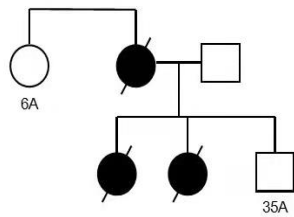

Family13

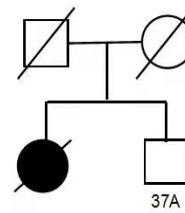

Family14

Figure 1. The pedigree structures with SUD for WES

Squares: male; Circles: female; Diagonal line: deceased individual; SUD individuals are indicated with black filled symbols, whereas members died of lethal diseases are indicated by blank symbols and diagonal lines.
