# Supplementary material for: Whole exome sequencing with a focus on cardiac disease-associated genes in families of sudden unexplained deaths in Yunnan, southwest of China
Source: Springer Nature journal article supplement (doi:10.1186/s12864-022-09097-0), 2023-01-31
Supplement: 12864_2022_9097_MOESM3_ESM.pdf [file 12864_2022_9097_MOESM3_ESM.pdf]

Table 1. Information of the persons from SUD families for WES

| NO.     | Family<br>Number* | Gender | Age<br>(year) | NO.     | Family<br>number* | Gender | Age<br>(year) |
|---------|-------------------|--------|---------------|---------|-------------------|--------|---------------|
| AJZ-1A  | 1                 | male   | 51            | HP-9A   | 8                 | male   | 45            |
| ALH-19A | 2                 | male   | 35            | HP-18A  | 8                 | female | 48            |
| ALH-21A | 2                 | male   | 4             | HP-24A  | 9                 | male   | 34            |
| ALH-20A | 3                 | male   | 3             | QS-10A  | 10                | male   | 68            |
| ALH-22A | 3                 | female | 25            | SGZ-42A | 11                | male   | 65            |
| DP-2A   | 4                 | female | 40            | SGZ-43A | 11                | male   | 11            |
| DP-4A   | 4                 | female | 31            | SJ-6A   | 12                | female | 46            |
| DP-18A  | 4                 | male   | 5             | TJ-15A  | 13                | male   | 42            |
| DP-3A   | 5                 | female | 39            | TJ-22A  | 13                | female | 64            |
| DP-20A  | 5                 | female | 74            | TJ-25A  | 13                | male   | 66            |
| GT-6A   | 6                 | male   | 53            | TJ-8A   | 14                | female | 59            |
| GT-35A  | 6                 | male   | 24            | TJ-30A  | 14                | male   | 55            |
| GT-37A  | 7                 | male   | 20            |         |                   |        |               |

\*: The same number means same family.
